# Supplementary material
Source: PubMed Central journal article supplement (PMC10076517)
Supplement: 41598_2023_31537_MOESM1_ESM.pdf [file 41598_2023_31537_MOESM1_ESM.pdf]

## Supplementary Figure 1

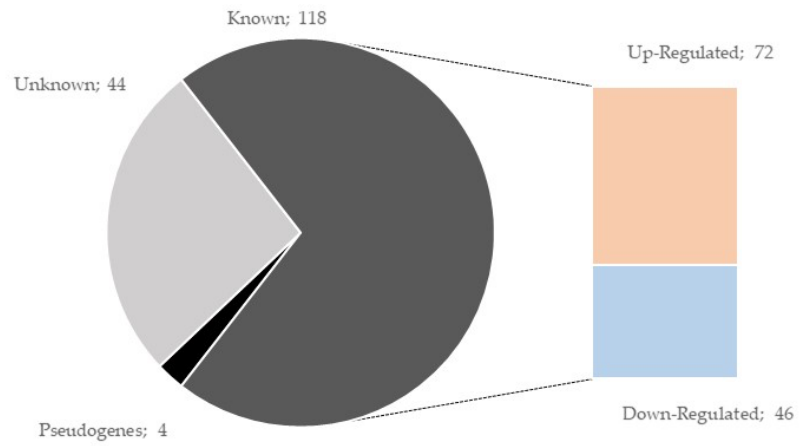

Pie chart indicating the number of unknown genes, pseudogenes, and known genes up and down-regulated after manual classification of genes with differential expression in Low vs. High MVPA children
